# Supplementary material for: Clinical, Technical, and MRI Features Associated with Patients’ Outcome at 3 Months and 2 Years following Prostate Artery Embolization: Is There an Added Value of Radiomics?
Source: MDPI journal article supplement (doi:10.3390/jpm14010067), 2024-01-04
Supplement: s1 [file s1]

## SUPPLEMENTARY MATERIAL

**Supplementary Table S1.** Changes in prostate volume, IPSS and QOL in the entire cohort.

| Endpoint                                             | Mean $\pm$ SD    | Median [Q1-Q3] (min-max)             | No. Of missing values |
|------------------------------------------------------|------------------|--------------------------------------|-----------------------|
| <b>QOL</b>                                           |                  |                                      |                       |
| Initial QOL before PAE                               | 4.7 $\pm$ 1.1    | 5 [4 - 6] (1 - 6)                    | 1                     |
| QOL at M3                                            | 2.1 $\pm$ 1.6    | 2 [1 - 3] (0 - 6)                    | 1                     |
| QOL at last FU                                       | 2.5 $\pm$ 1.8    | 3 [1 - 4] (1 - 4)                    | 2                     |
| Absolute change in QOL from baseline to M3           | -2.6 $\pm$ 1.6   | -3 [-4 - -1] (-6 - 0)                | 1                     |
| Relative change in QOL from baseline to M3 (%)       | -54.8 $\pm$ 31.4 | -60 [-77.5 - -25] (-100 - 0)         | 1                     |
| Absolute change in QOL from baseline to last FU      | -2.2 $\pm$ 2     | -2 [-4 - -0.2] (-6 - 4)              | 2                     |
| Relative change in QOL from baseline to last FU (%)  | -43.5 $\pm$ 47.2 | -50 [-80 - -4.2] (-100 - 200)        | 2                     |
| <b>IPSS</b>                                          |                  |                                      |                       |
| Initial IPSS before PAE                              | 18.7 $\pm$ 6.3   | 19 [13 - 23] (8 - 32)                | 0                     |
| IPSS at M3                                           | 8.9 $\pm$ 6.8    | 7 [4 - 12] (1 - 33)                  | 0                     |
| IPSS at last FU                                      | 11.4 $\pm$ 7.6   | 10 [5 - 15] (0 - 28)                 | 1                     |
| Absolute change in IPSS from baseline to M3          | -9.8 $\pm$ 7.4   | -10 [-15 - -4] (-31 - 5)             | 0                     |
| Relative change in IPSS from baseline to M3 (%)      | -50.8 $\pm$ 31.7 | -59.1 [-75.3 - -30.2] (-96.9 - 21.7) | 0                     |
| Absolute change in IPSS from baseline to last FU     | -7.3 $\pm$ 7.8   | -7 [-13 - -2.5] (-24 - 17)           | 1                     |
| Relative change in IPSS from baseline to last FU (%) | -36.6 $\pm$ 45.9 | -43.8 [-66.7 - -16.1] (-100 - 212.5) | 1                     |
| <b>Prostate volume</b>                               |                  |                                      |                       |
| Initial volume before PAE                            | 92.1 $\pm$ 40.7  | 80 [60 - 122.5] (38 - 200)           | 0                     |
| Volume at M3                                         | 74.3 $\pm$ 31.8  | 65 [50 - 99] (25 - 162)              | 0                     |
| Absolute change in volume from baseline to M3        | -17.7 $\pm$ 22   | -11 [-25 - -3] (-120 - 15)           | 0                     |
| Relative change in volume from baseline to M3 (%)    | -17.2 $\pm$ 16.4 | -17.4 [-25.5 - -5.6] (-61.5 - 25.4)  | 0                     |

NOTE.- Abbreviations: FU: follow-up (at least 2 years), IPSS: international prostate score symptom, no.: number, M3: at 3 months after prostate artery embolization, PAE: prostate artery embolization, QOL: quality of life

**Supplementary Table S2.** Reproducibility analysis of the radiomics features  
(i.e., intraclass correlation coefficient [ICC] and 95% confidence interval [CI])

| Radiomics features                                       | ICC (95%CI)           | P-value    |
|----------------------------------------------------------|-----------------------|------------|
| ADC_GLRLM_LowGreyLevelRunEmphasis                        | 1 (1 - 1)             | <0.0001*** |
| ADC_GLSZM_LowGrayLevelZoneEmphasis                       | 1 (1 - 1)             | <0.0001*** |
| ADC_GLCM2_AngularSecondMoment                            | 1 (1 - 1)             | <0.0001*** |
| ADC_GLCM_AngularSecondMoment                             | 1 (1 - 1)             | <0.0001*** |
| ADC_GLCM4_AngularSecondMoment                            | 1 (1 - 1)             | <0.0001*** |
| ADC_GLCM2_JointMaximum                                   | 1 (1 - 1)             | <0.0001*** |
| ADC_GLCM_JointMaximum                                    | 1 (1 - 1)             | <0.0001*** |
| ADC_GLCM4_JointMaximum                                   | 1 (1 - 1)             | <0.0001*** |
| ADC_GLSZM_NormalisedGreyLevelNonUniformity               | 1 (1 - 1)             | <0.0001*** |
| ADC_INTENSITY-HISTOGRAM_UniformityIBSI                   | 1 (1 - 1)             | <0.0001*** |
| ADC_GLCM2_InverseDifferenceMoment                        | 1 (0.999 - 1)         | <0.0001*** |
| ADC_INTENSITY-BASED_75thPercentile                       | 1 (0.999 - 1)         | <0.0001*** |
| ADC_GLCM_InverseDifferenceMoment                         | 1 (0.999 - 1)         | <0.0001*** |
| ADC_INTENSITY-HISTOGRAM_INTENSITYHistogram75thPercentile | 0.999 (0.999 - 1)     | <0.0001*** |
| ADC_GLCM2_InverseDifference                              | 0.999 (0.999 - 1)     | <0.0001*** |
| ADC_GLRLM_RunPercentage                                  | 0.999 (0.999 - 1)     | <0.0001*** |
| ADC_GLCM2_JointAverage                                   | 0.999 (0.999 - 1)     | <0.0001*** |
| ADC_GLCM2_SumAverage                                     | 0.999 (0.999 - 1)     | <0.0001*** |
| ADC_GLCM_InverseDifference                               | 0.999 (0.999 - 1)     | <0.0001*** |
| ADC_GLCM_JointAverage                                    | 0.999 (0.999 - 0.999) | <0.0001*** |
| ADC_GLCM_SumAverage                                      | 0.999 (0.999 - 0.999) | <0.0001*** |
| ADC_INTENSITY-BASED_RootMeanSquare                       | 0.999 (0.999 - 0.999) | <0.0001*** |
| ADC_GLCM4_JointAverage                                   | 0.999 (0.999 - 0.999) | <0.0001*** |
| ADC_GLCM4_SumAverage                                     | 0.999 (0.999 - 0.999) | <0.0001*** |
| ADC_INTENSITY-BASED_Median                               | 0.999 (0.999 - 0.999) | <0.0001*** |
| ADC_INTENSITY-BASED_50thPercentile                       | 0.999 (0.999 - 0.999) | <0.0001*** |
| ADC_INTENSITY-BASED_Mean                                 | 0.999 (0.999 - 0.999) | <0.0001*** |
| ADC_INTENSITY-BASED_AreaUnderCurve                       | 0.999 (0.999 - 0.999) | <0.0001*** |
| ADC_INTENSITY-HISTOGRAM_AreaUnderCurveCsh                | 0.999 (0.999 - 0.999) | <0.0001*** |
| ADC_INTENSITY-HISTOGRAM_INTENSITYHistogramMean           | 0.999 (0.999 - 0.999) | <0.0001*** |
| ADC_INTENSITY-HISTOGRAM_INTENSITYHistogramMedian         | 0.999 (0.998 - 0.999) | <0.0001*** |
| ADC_INTENSITY-HISTOGRAM_INTENSITYHistogram50thPercentile | 0.999 (0.998 - 0.999) | <0.0001*** |
| ADC_INTENSITY-BASED_90thPercentile                       | 0.999 (0.998 - 0.999) | <0.0001*** |
| ADC_INTENSITY-HISTOGRAM_INTENSITYHistogram90thPercentile | 0.999 (0.998 - 0.999) | <0.0001*** |
| ADC_GLCM2_Autocorrelation                                | 0.999 (0.998 - 0.999) | <0.0001*** |
| ADC_GLCM_Autocorrelation                                 | 0.999 (0.998 - 0.999) | <0.0001*** |
| ADC_GLRLM_ShortRunsEmphasis                              | 0.998 (0.997 - 0.999) | <0.0001*** |
| ADC_GLRLM_LongRunHighGreyLevelEmphasis                   | 0.998 (0.997 - 0.999) | <0.0001*** |
| ADC_GLRLM_HighGreyLevelRunEmphasis                       | 0.998 (0.997 - 0.999) | <0.0001*** |
| ADC_GLRLM_ShortRunHighGreyLevelEmphasis                  | 0.998 (0.997 - 0.999) | <0.0001*** |
| ADC_INTENSITY-BASED_25thPercentile                       | 0.998 (0.997 - 0.999) | <0.0001*** |
| ADC_GLCM4_Autocorrelation                                | 0.998 (0.996 - 0.998) | <0.0001*** |
| ADC_INTENSITY-HISTOGRAM_INTENSITYHistogram25thPercentile | 0.998 (0.996 - 0.998) | <0.0001*** |
| ADC_GLCM_DifferenceEntropy                               | 0.997 (0.996 - 0.998) | <0.0001*** |
| ADC_GLCM_JointEntropyLog2                                | 0.997 (0.996 - 0.998) | <0.0001*** |
| ADC_GLCM_JointEntropyLog10                               | 0.997 (0.996 - 0.998) | <0.0001*** |
| ADC_GLCM2_JointEntropyLog2                               | 0.997 (0.996 - 0.998) | <0.0001*** |
| ADC_GLCM2_DifferenceEntropy                              | 0.997 (0.996 - 0.998) | <0.0001*** |
| ADC_GLCM2_JointEntropyLog10                              | 0.997 (0.996 - 0.998) | <0.0001*** |
| ADC_GLSZM_ZoneSizeEntropy                                | 0.997 (0.995 - 0.998) | <0.0001*** |
| ADC_GLSZM_HighGrayLevelZoneEmphasis                      | 0.997 (0.995 - 0.998) | <0.0001*** |
| ADC_GLSZM_SmallZoneEmphasis                              | 0.996 (0.994 - 0.998) | <0.0001*** |
| T2_GLSZM_LargeZoneLowGreyLevelEmphasis                   | 0.996 (0.994 - 0.997) | <0.0001*** |
| ADC_INTENSITY-HISTOGRAM_INTENSITYHistogramEntropyLog2    | 0.996 (0.994 - 0.997) | <0.0001*** |
| ADC_INTENSITY-HISTOGRAM_INTENSITYHistogramEntropyLog10   | 0.996 (0.994 - 0.997) | <0.0001*** |
| ADC_GLSZM_ZonePercentage                                 | 0.994 (0.992 - 0.996) | <0.0001*** |
| T2_GLSZM_LargeZoneHighGreyLevelEmphasis                  | 0.994 (0.991 - 0.996) | <0.0001*** |
| ADC_GLSZM_SmallZoneHighGreyLevelEmphasis                 | 0.994 (0.991 - 0.996) | <0.0001*** |
| ADC_INTENSITY-BASED_10thPercentile                       | 0.994 (0.991 - 0.996) | <0.0001*** |
| T2_GLCM2_Autocorrelation                                 | 0.993 (0.99 - 0.996)  | <0.0001*** |
| ADC_INTENSITY-HISTOGRAM_INTENSITYHistogram10thPercentile | 0.993 (0.99 - 0.995)  | <0.0001*** |
| T2_GLCM4_Autocorrelation                                 | 0.993 (0.989 - 0.995) | <0.0001*** |
| ADC_INTENSITY-HISTOGRAM_INTENSITYHistogramModel          | 0.993 (0.989 - 0.995) | <0.0001*** |
| T2_GLSZM_ZoneSizeVariance                                | 0.993 (0.989 - 0.995) | <0.0001*** |

|                                                           |                       |            |
|-----------------------------------------------------------|-----------------------|------------|
| T2_GLCM_Autocorrelation                                   | 0.992 (0.989 - 0.995) | <0.0001*** |
| T2_GLSZM_LargeZoneEmphasis                                | 0.992 (0.989 - 0.995) | <0.0001*** |
| ADC_GLSZM_NormalisedZoneSizeNonUniformity                 | 0.992 (0.989 - 0.995) | <0.0001*** |
| T2_GLCM2_JointAverage                                     | 0.992 (0.989 - 0.995) | <0.0001*** |
| T2_GLCM2_SumAverage                                       | 0.992 (0.989 - 0.995) | <0.0001*** |
| T2_GLCM4_JointAverage                                     | 0.992 (0.988 - 0.995) | <0.0001*** |
| T2_GLCM4_SumAverage                                       | 0.992 (0.988 - 0.995) | <0.0001*** |
| ADC_GLCM4_DifferenceEntropy                               | 0.992 (0.987 - 0.994) | <0.0001*** |
| ADC_GLCM4_JointEntropyLog2                                | 0.992 (0.987 - 0.994) | <0.0001*** |
| ADC_GLCM4_JointEntropyLog10                               | 0.992 (0.987 - 0.994) | <0.0001*** |
| T2_INTENSITY-BASED_Median                                 | 0.991 (0.987 - 0.994) | <0.0001*** |
| T2_INTENSITY-BASED_50thPercentile                         | 0.991 (0.987 - 0.994) | <0.0001*** |
| T2_INTENSITY-BASED_75thPercentile                         | 0.991 (0.987 - 0.994) | <0.0001*** |
| T2_GLCM_JointAverage                                      | 0.991 (0.987 - 0.994) | <0.0001*** |
| T2_GLCM_SumAverage                                        | 0.991 (0.987 - 0.994) | <0.0001*** |
| T2_GLRLM_LongRunHighGreyLevelEmphasis                     | 0.991 (0.986 - 0.994) | <0.0001*** |
| T2_INTENSITY-BASED_90thPercentile                         | 0.991 (0.986 - 0.994) | <0.0001*** |
| T2_INTENSITY-HISTOGRAM_INTENSITYHistogramMedian           | 0.991 (0.986 - 0.994) | <0.0001*** |
| T2_INTENSITY-HISTOGRAM_INTENSITYHistogram50thPercentile   | 0.991 (0.986 - 0.994) | <0.0001*** |
| T2_INTENSITY-HISTOGRAM_INTENSITYHistogram75thPercentile   | 0.991 (0.986 - 0.994) | <0.0001*** |
| T2_INTENSITY-HISTOGRAM_INTENSITYHistogram90thPercentile   | 0.99 (0.985 - 0.993)  | <0.0001*** |
| T2_INTENSITY-BASED_RootMeanSquare                         | 0.99 (0.985 - 0.993)  | <0.0001*** |
| T2_GLRLM_HighGreyLevelRunEmphasis                         | 0.99 (0.985 - 0.993)  | <0.0001*** |
| T2_GLRLM_ShortRunHighGreyLevelEmphasis                    | 0.989 (0.984 - 0.993) | <0.0001*** |
| T2_GLRLM_LongRunsEmphasis                                 | 0.988 (0.982 - 0.992) | <0.0001*** |
| T2_GLRLM_RunPercentage                                    | 0.988 (0.982 - 0.992) | <0.0001*** |
| T2_INTENSITY-BASED_AreaUnderCurve                         | 0.988 (0.981 - 0.992) | <0.0001*** |
| T2_INTENSITY-BASED_Mean                                   | 0.988 (0.981 - 0.992) | <0.0001*** |
| T2_GLSZM_ZonePercentage                                   | 0.988 (0.981 - 0.992) | <0.0001*** |
| T2_INTENSITY-HISTOGRAM_AreaUnderCurveCsh                  | 0.988 (0.981 - 0.992) | <0.0001*** |
| T2_INTENSITY-HISTOGRAM_INTENSITYHistogramMean             | 0.988 (0.981 - 0.992) | <0.0001*** |
| T2_GLRLM_ShortRunsEmphasis                                | 0.987 (0.981 - 0.991) | <0.0001*** |
| T2_GLCM_InverseDifference                                 | 0.987 (0.98 - 0.991)  | <0.0001*** |
| T2_GLCM_InverseDifferenceMoment                           | 0.987 (0.98 - 0.991)  | <0.0001*** |
| T2_GLSZM_HighGrayLevelZoneEmphasis                        | 0.987 (0.98 - 0.991)  | <0.0001*** |
| T2_GLCM2_Contrast                                         | 0.987 (0.98 - 0.991)  | <0.0001*** |
| T2_GLCM_DifferenceAverage                                 | 0.986 (0.979 - 0.991) | <0.0001*** |
| T2_GLCM_Dissimilarity                                     | 0.986 (0.979 - 0.991) | <0.0001*** |
| T2_GLCM4_Contrast                                         | 0.986 (0.979 - 0.99)  | <0.0001*** |
| T2_INTENSITY-BASED_25thPercentile                         | 0.986 (0.978 - 0.99)  | <0.0001*** |
| T2_GLCM2_DifferenceAverage                                | 0.985 (0.978 - 0.99)  | <0.0001*** |
| T2_GLCM2_Dissimilarity                                    | 0.985 (0.978 - 0.99)  | <0.0001*** |
| T2_GLSZM_SmallZoneHighGreyLevelEmphasis                   | 0.985 (0.978 - 0.99)  | <0.0001*** |
| T2_GLCM_Contrast                                          | 0.985 (0.977 - 0.99)  | <0.0001*** |
| T2_INTENSITY-HISTOGRAM_INTENSITYHistogramModel            | 0.984 (0.977 - 0.99)  | <0.0001*** |
| T2_GLCM2_JointVariance                                    | 0.984 (0.976 - 0.99)  | <0.0001*** |
| ADC_GLCM_DifferenceAverage                                | 0.984 (0.976 - 0.989) | <0.0001*** |
| ADC_GLCM_Dissimilarity                                    | 0.984 (0.976 - 0.989) | <0.0001*** |
| T2_GLCM2_DifferenceVariance                               | 0.984 (0.976 - 0.989) | <0.0001*** |
| T2_GLCM4_DifferenceVariance                               | 0.984 (0.976 - 0.989) | <0.0001*** |
| T2_GLCM_JointVariance                                     | 0.984 (0.976 - 0.989) | <0.0001*** |
| T2_INTENSITY-HISTOGRAM_INTENSITYHistogram25thPercentile   | 0.983 (0.975 - 0.989) | <0.0001*** |
| T2_GLCM2_InverseDifference                                | 0.983 (0.975 - 0.989) | <0.0001*** |
| T2_GLCM4_JointVariance                                    | 0.983 (0.974 - 0.989) | <0.0001*** |
| T2_GLCM2_InverseDifferenceMoment                          | 0.983 (0.974 - 0.989) | <0.0001*** |
| T2_INTENSITY-HISTOGRAM_MaximumHistogramGradientGreyLevel  | 0.982 (0.974 - 0.988) | <0.0001*** |
| T2_GLCM_SumVariance                                       | 0.982 (0.974 - 0.988) | <0.0001*** |
| T2_GLCM_ClusterTendency                                   | 0.982 (0.974 - 0.988) | <0.0001*** |
| ADC_GLCM2_Correlation                                     | 0.982 (0.972 - 0.988) | <0.0001*** |
| T2_GLCM4_DifferenceAverage                                | 0.981 (0.971 - 0.987) | <0.0001*** |
| T2_GLCM4_Dissimilarity                                    | 0.981 (0.971 - 0.987) | <0.0001*** |
| ADC_INTENSITY-HISTOGRAM_MaximumHistogramGradientGreyLevel | 0.981 (0.971 - 0.987) | <0.0001*** |
| T2_GLCM2_SumVariance                                      | 0.98 (0.971 - 0.987)  | <0.0001*** |
| T2_GLCM2_ClusterTendency                                  | 0.98 (0.971 - 0.987)  | <0.0001*** |
| ADC_GLCM2_DifferenceAverage                               | 0.979 (0.969 - 0.986) | <0.0001*** |
| ADC_GLCM2_Dissimilarity                                   | 0.979 (0.969 - 0.986) | <0.0001*** |
| T2_GLCM_DifferenceVariance                                | 0.978 (0.967 - 0.985) | <0.0001*** |
| T2_GLCM4_SumVariance                                      | 0.978 (0.967 - 0.985) | <0.0001*** |
| T2_GLCM4_ClusterTendency                                  | 0.978 (0.967 - 0.985) | <0.0001*** |
| ADC_GLCM4_InverseDifferenceMoment                         | 0.978 (0.966 - 0.985) | <0.0001*** |

|                                                                           |                       |            |
|---------------------------------------------------------------------------|-----------------------|------------|
| ADC_GLRLM_LongRunLowGreyLevelEmphasis                                     | 0.978 (0.966 - 0.985) | <0.0001*** |
| ADC_INTENSITY-HISTOGRAM_INTENSITYHistogramRobustMeanAbsoluteDeviation     | 0.977 (0.965 - 0.985) | <0.0001*** |
| ADC_GLRLM_LongRunsEmphasis                                                | 0.977 (0.965 - 0.985) | <0.0001*** |
| ADC_INTENSITY-BASED_InterquartileRange                                    | 0.976 (0.964 - 0.984) | <0.0001*** |
| ADC_INTENSITY-BASED_RobustMeanAbsoluteDeviation                           | 0.976 (0.963 - 0.984) | <0.0001*** |
| T2_INTENSITY-HISTOGRAM_INTENSITYHistogramRobustMeanAbsoluteDeviation      | 0.974 (0.961 - 0.982) | <0.0001*** |
| T2_GLCM4_InverseDifference                                                | 0.973 (0.96 - 0.982)  | <0.0001*** |
| ADC_INTENSITY-HISTOGRAM_INTENSITYHistogramInterquartileRange              | 0.973 (0.959 - 0.982) | <0.0001*** |
| T2_INTENSITY-BASED_InterquartileRange                                     | 0.973 (0.96 - 0.982)  | <0.0001*** |
| T2_INTENSITY-BASED_RobustMeanAbsoluteDeviation                            | 0.973 (0.959 - 0.982) | <0.0001*** |
| T2_INTENSITY-HISTOGRAM_INTENSITYHistogramVariance                         | 0.972 (0.959 - 0.981) | <0.0001*** |
| T2_INTENSITY-BASED_Variance                                               | 0.972 (0.959 - 0.981) | <0.0001*** |
| T2_GLCM4_InverseDifferenceMoment                                          | 0.972 (0.958 - 0.981) | <0.0001*** |
| ADC_GLCM_Correlation                                                      | 0.97 (0.955 - 0.98)   | <0.0001*** |
| T2_GLCM_ClusterShade                                                      | 0.97 (0.955 - 0.98)   | <0.0001*** |
| ADC_GLCM4_InverseDifference                                               | 0.97 (0.954 - 0.98)   | <0.0001*** |
| ADC_INTENSITY-HISTOGRAM_INTENSITYHistogramQuartileCoefficientOfDispersion | 0.969 (0.953 - 0.979) | <0.0001*** |
| T2_INTENSITY-BASED_MeanAbsoluteDeviation                                  | 0.967 (0.951 - 0.978) | <0.0001*** |
| T2_INTENSITY-HISTOGRAM_INTENSITYHistogramMeanAbsoluteDeviation            | 0.967 (0.951 - 0.978) | <0.0001*** |
| T2_GLCM_JointMaximum                                                      | 0.967 (0.951 - 0.978) | <0.0001*** |
| T2_GLCM2_ClusterShade                                                     | 0.966 (0.949 - 0.977) | <0.0001*** |
| T2_GLCM_ClusterProminence                                                 | 0.966 (0.949 - 0.977) | <0.0001*** |
| T2_INTENSITY-HISTOGRAM_INTENSITYHistogram10thPercentile                   | 0.965 (0.948 - 0.977) | <0.0001*** |
| T2_GLSZM_NormalisedZoneSizeNonUniformity                                  | 0.965 (0.948 - 0.977) | <0.0001*** |
| T2_GLCM4_JointMaximum                                                     | 0.964 (0.947 - 0.976) | <0.0001*** |
| ADC_INTENSITY-HISTOGRAM_RootMeanSquare                                    | 0.964 (0.946 - 0.977) | <0.0001*** |
| T2_INTENSITY-BASED_MedianAbsoluteDeviation                                | 0.964 (0.947 - 0.976) | <0.0001*** |
| T2_INTENSITY-HISTOGRAM_INTENSITYHistogramMedianAbsoluteDeviation          | 0.964 (0.947 - 0.976) | <0.0001*** |
| T2_INTENSITY-BASED_10thPercentile                                         | 0.964 (0.946 - 0.976) | <0.0001*** |
| T2_GLCM2_ClusterProminence                                                | 0.964 (0.946 - 0.976) | <0.0001*** |
| T2_GLCM4_ClusterShade                                                     | 0.963 (0.946 - 0.976) | <0.0001*** |
| T2_INTENSITY-BASED_QuartileCoefficientOfDispersion                        | 0.963 (0.945 - 0.975) | <0.0001*** |
| T2_GLCM_JointEntropyLog10                                                 | 0.963 (0.945 - 0.975) | <0.0001*** |
| T2_GLCM_JointEntropyLog2                                                  | 0.963 (0.945 - 0.975) | <0.0001*** |
| T2_GLCM_DifferenceEntropy                                                 | 0.963 (0.945 - 0.975) | <0.0001*** |
| T2_GLSZM_SmallZoneEmphasis                                                | 0.963 (0.945 - 0.975) | <0.0001*** |
| ADC_INTENSITY-HISTOGRAM_INTENSITYHistogramMedianAbsoluteDeviation         | 0.963 (0.944 - 0.975) | <0.0001*** |
| ADC_INTENSITY-BASED_MedianAbsoluteDeviation                               | 0.963 (0.944 - 0.975) | <0.0001*** |
| T2_NGTDm_Contrast                                                         | 0.962 (0.944 - 0.975) | <0.0001*** |
| ADC_INTENSITY-HISTOGRAM_INTENSITYHistogramMeanAbsoluteDeviation           | 0.962 (0.943 - 0.975) | <0.0001*** |
| T2_GLCM4_ClusterProminence                                                | 0.962 (0.944 - 0.975) | <0.0001*** |
| ADC_INTENSITY-BASED_MeanAbsoluteDeviation                                 | 0.962 (0.943 - 0.975) | <0.0001*** |
| T2_GLCM_SumEntropy                                                        | 0.962 (0.943 - 0.974) | <0.0001*** |
| T2_INTENSITY-HISTOGRAM_INTENSITYHistogramInterquartileRange               | 0.961 (0.941 - 0.974) | <0.0001*** |
| T2_GLCM2_JointEntropyLog2                                                 | 0.96 (0.941 - 0.974)  | <0.0001*** |
| T2_GLCM2_DifferenceEntropy                                                | 0.96 (0.941 - 0.974)  | <0.0001*** |
| T2_GLCM2_JointEntropyLog10                                                | 0.96 (0.941 - 0.974)  | <0.0001*** |
| T2_GLCM2_SumEntropy                                                       | 0.96 (0.94 - 0.973)   | <0.0001*** |
| ADC_INTENSITY-HISTOGRAM_INTENSITYHistogramMaximumGreyLevel                | 0.959 (0.938 - 0.973) | <0.0001*** |
| ADC_GLCM2_InverseVariance                                                 | 0.959 (0.938 - 0.973) | <0.0001*** |
| ADC_GLCM_InverseVariance                                                  | 0.959 (0.938 - 0.973) | <0.0001*** |
| T2_GLCM_AngularSecondMoment                                               | 0.959 (0.938 - 0.972) | <0.0001*** |
| T2_INTENSITY-HISTOGRAM_INTENSITYHistogramStandardDeviation                | 0.959 (0.938 - 0.972) | <0.0001*** |
| T2_INTENSITY-BASED_StandardDeviation                                      | 0.959 (0.938 - 0.972) | <0.0001*** |
| ADC_INTENSITY-BASED_MaximumGreyLevel                                      | 0.957 (0.935 - 0.971) | <0.0001*** |
| T2_GLSZM_GreyLevelVariance                                                | 0.957 (0.936 - 0.971) | <0.0001*** |
| T2_GLCM2_JointMaximum                                                     | 0.957 (0.935 - 0.971) | <0.0001*** |
| T2_GLCM4_JointEntropyLog10                                                | 0.956 (0.935 - 0.971) | <0.0001*** |
| T2_GLCM4_JointEntropyLog2                                                 | 0.956 (0.935 - 0.971) | <0.0001*** |
| T2_GLCM4_DifferenceEntropy                                                | 0.956 (0.935 - 0.971) | <0.0001*** |
| T2_GLCM4_SumEntropy                                                       | 0.956 (0.934 - 0.97)  | <0.0001*** |
| T2_GLCM4_AngularSecondMoment                                              | 0.954 (0.932 - 0.969) | <0.0001*** |
| T2_GLCM2_AngularSecondMoment                                              | 0.954 (0.932 - 0.969) | <0.0001*** |
| ADC_GLSZM_SmallZoneLowGreyLevelEmphasis                                   | 0.954 (0.931 - 0.97)  | <0.0001*** |
| ADC_GLRLM_ShortRunLowGreyLevelEmphasis                                    | 0.95 (0.925 - 0.967)  | <0.0001*** |
| ADC_GLSZM_ZoneSizeVariance                                                | 0.95 (0.925 - 0.967)  | <0.0001*** |
| ADC_INTENSITY-HISTOGRAM_INTENSITYHistogramCoefficientOfVariation          | 0.947 (0.921 - 0.965) | <0.0001*** |

|                                                                          |                       |            |
|--------------------------------------------------------------------------|-----------------------|------------|
| ADC_INTENSITY-HISTOGRAM_INTENSITYHistogramStandardDeviation              | 0.947 (0.92 - 0.965)  | <0.0001*** |
| ADC_INTENSITY-BASED_StandardDeviation                                    | 0.947 (0.92 - 0.965)  | <0.0001*** |
| T2_MORPHOLOGICAL_IntegratedT2_INTENSITY                                  | 0.946 (0.92 - 0.964)  | <0.0001*** |
| T2_INTENSITY-HISTOGRAM_INTENSITYHistogramQuartileCoefficientOfDispersion | 0.946 (0.92 - 0.964)  | <0.0001*** |
| T2_MORPHOLOGICAL_Compacity                                               | 0.943 (0.915 - 0.962) | <0.0001*** |
| T2_INTENSITY-HISTOGRAM_UniformityIBSI                                    | 0.942 (0.914 - 0.961) | <0.0001*** |
| ADC_INTENSITY-HISTOGRAM_MaximumHistogramGradient                         | 0.941 (0.911 - 0.961) | <0.0001*** |
| ADC_INTENSITY-HISTOGRAM_MinimumHistogramGradient                         | 0.938 (0.907 - 0.959) | <0.0001*** |
| T2_INTENSITY-HISTOGRAM_INTENSITYHistogramEntropyLog2                     | 0.937 (0.906 - 0.957) | <0.0001*** |
| T2_INTENSITY-HISTOGRAM_INTENSITYHistogramEntropyLog10                    | 0.937 (0.906 - 0.957) | <0.0001*** |
| T2_INTENSITY-HISTOGRAM_INTENSITYHistogramCoefficientOfVariation          | 0.936 (0.905 - 0.957) | <0.0001*** |
| T2_INTENSITY-BASED_CoefficientOfVariation                                | 0.936 (0.905 - 0.957) | <0.0001*** |
| T2_NGTD_M_Complexity                                                     | 0.935 (0.904 - 0.956) | <0.0001*** |
| ADC_NGTD_M_Busyness                                                      | 0.935 (0.899 - 0.958) | <0.0001*** |
| ADC_GLCM_Contrast                                                        | 0.934 (0.901 - 0.956) | <0.0001*** |
| T2_MORPHOLOGICAL_Volume                                                  | 0.933 (0.9 - 0.955)   | <0.0001*** |
| ADC_INTENSITY-BASED_QuartileCoefficientOfDispersion                      | 0.93 (0.895 - 0.953)  | <0.0001*** |
| ADC_NGTD_M_Strength                                                      | 0.929 (0.894 - 0.953) | <0.0001*** |
| T2_INTENSITY-HISTOGRAM_MaximumHistogramGradient                          | 0.928 (0.894 - 0.951) | <0.0001*** |
| T2_INTENSITY-BASED_Energy                                                | 0.924 (0.889 - 0.949) | <0.0001*** |
| T2_GLCM_Correlation                                                      | 0.924 (0.888 - 0.949) | <0.0001*** |
| ADC_GLCM2_NormalisedInverseDifference                                    | 0.923 (0.885 - 0.949) | <0.0001*** |
| T2_MORPHOLOGICAL_Maximum3DDiameter                                       | 0.919 (0.881 - 0.945) | <0.0001*** |
| T2_MORPHOLOGICAL_SurfaceToVolumeRatio                                    | 0.918 (0.88 - 0.945)  | <0.0001*** |
| T2_MORPHOLOGICAL_Sphericity                                              | 0.918 (0.879 - 0.945) | <0.0001*** |
| ADC_GLRLM_GreyLevelNonUniformity                                         | 0.918 (0.878 - 0.945) | <0.0001*** |
| ADC_GLCM_NormalisedInverseDifference                                     | 0.918 (0.877 - 0.945) | <0.0001*** |
| T2_MORPHOLOGICAL_SphericalDisproportion                                  | 0.917 (0.878 - 0.944) | <0.0001*** |
| T2_MORPHOLOGICAL_Asphericity                                             | 0.917 (0.878 - 0.944) | <0.0001*** |
| ADC_INTENSITY-BASED_Energy                                               | 0.916 (0.874 - 0.944) | <0.0001*** |
| T2_MORPHOLOGICAL_Compactness1                                            | 0.915 (0.876 - 0.943) | <0.0001*** |
| ADC_GLCM2_Contrast                                                       | 0.915 (0.873 - 0.944) | <0.0001*** |
| T2_INTENSITY-HISTOGRAM_MinimumHistogramGradient                          | 0.913 (0.872 - 0.941) | <0.0001*** |
| ADC_GLCM4_SumVariance                                                    | 0.912 (0.869 - 0.941) | <0.0001*** |
| ADC_GLCM4_ClusterTendency                                                | 0.912 (0.869 - 0.941) | <0.0001*** |
| ADC_NGTD_M_Contrast                                                      | 0.909 (0.86 - 0.941)  | <0.0001*** |
| T2_MORPHOLOGICAL_SurfaceArea                                             | 0.908 (0.866 - 0.938) | <0.0001*** |
| ADC_GLSZM_GreyLevelNonUniformity                                         | 0.908 (0.863 - 0.939) | <0.0001*** |
| T2_MORPHOLOGICAL_Compactness2                                            | 0.904 (0.859 - 0.935) | <0.0001*** |
| T2_GLCM2_Correlation                                                     | 0.9 (0.853 - 0.932)   | <0.0001*** |
| T2_GLRLM_GreyLevelNonUniformity                                          | 0.895 (0.847 - 0.929) | <0.0001*** |
| ADC_GLCM_DifferenceVariance                                              | 0.894 (0.843 - 0.929) | <0.0001*** |
| ADC_GLCM2_JointVariance                                                  | 0.892 (0.84 - 0.928)  | <0.0001*** |
| ADC_GLCM_JointVariance                                                   | 0.889 (0.835 - 0.925) | <0.0001*** |
| ADC_INTENSITY-HISTOGRAM_INTENSITYHistogramRange                          | 0.888 (0.834 - 0.925) | <0.0001*** |
| ADC_INTENSITY-BASED_MinimumGreyLevel                                     | 0.887 (0.832 - 0.924) | <0.0001*** |
| T2_GLSZM_GreyLevelNonUniformity                                          | 0.885 (0.831 - 0.922) | <0.0001*** |
| ADC_INTENSITY-HISTOGRAM_INTENSITYHistogramMinimumGreyLevel               | 0.884 (0.829 - 0.922) | <0.0001*** |
| ADC_INTENSITY-BASED_Range                                                | 0.883 (0.826 - 0.921) | <0.0001*** |
| ADC_GLCM4_InverseVariance                                                | 0.881 (0.824 - 0.921) | <0.0001*** |
| T2_GLCM4_NormalisedInverseDifference                                     | 0.879 (0.824 - 0.918) | <0.0001*** |
| ADC_INTENSITY-BASED_CoefficientOfVariation                               | 0.879 (0.821 - 0.919) | <0.0001*** |
| T2_GLCM4_NormalisedInverseDifferenceMoment                               | 0.878 (0.822 - 0.917) | <0.0001*** |
| T2_GLCM2_NormalisedInverseDifference                                     | 0.878 (0.822 - 0.917) | <0.0001*** |
| T2_GLCM2_NormalisedInverseDifferenceMoment                               | 0.877 (0.82 - 0.916)  | <0.0001*** |
| T2_GLSZM_NormalisedGreyLevelNonUniformity                                | 0.877 (0.82 - 0.916)  | <0.0001*** |
| ADC_GLRLM_RunLengthNonUniformity                                         | 0.875 (0.816 - 0.916) | <0.0001*** |
| ADC_GLSZM_ZoneSizeNonUniformity                                          | 0.874 (0.813 - 0.915) | <0.0001*** |
| ADC_GLCM4_JointVariance                                                  | 0.872 (0.811 - 0.914) | <0.0001*** |
| ADC_GLCM2_DifferenceVariance                                             | 0.871 (0.809 - 0.913) | <0.0001*** |
| T2_MORPHOLOGICAL_CentreOfMassShift                                       | 0.871 (0.811 - 0.912) | <0.0001*** |
| T2_NGTD_M_Busyness                                                       | 0.87 (0.81 - 0.911)   | <0.0001*** |
| T2_GLCM_NormalisedInverseDifference                                      | 0.868 (0.808 - 0.91)  | <0.0001*** |
| T2_GLSZM_ZoneSizeNonUniformity                                           | 0.866 (0.806 - 0.909) | <0.0001*** |
| T2_INTENSITY-BASED_Skewness                                              | 0.863 (0.801 - 0.907) | <0.0001*** |
| T2_INTENSITY-HISTOGRAM_INTENSITYHistogramSkewness                        | 0.862 (0.8 - 0.906)   | <0.0001*** |
| T2_GLCM_NormalisedInverseDifferenceMoment                                | 0.859 (0.796 - 0.904) | <0.0001*** |
| T2_NGTD_M_Strength                                                       | 0.859 (0.796 - 0.904) | <0.0001*** |
| ADC_INTENSITY-HISTOGRAM_INTENSITYHistogramVariance                       | 0.851 (0.782 - 0.9)   | <0.0001*** |

|                                                           |                        |            |
|-----------------------------------------------------------|------------------------|------------|
| ADC_INTENSITY-BASED_Variance                              | 0.851 (0.781 - 0.9)    | <0.0001*** |
| T2_GLCM4_Correlation                                      | 0.848 (0.78 - 0.897)   | <0.0001*** |
| T2_GLRLM_RunLengthNonUniformity                           | 0.84 (0.769 - 0.891)   | <0.0001*** |
| T2_MORPHOLOGICAL_ApproximateVolume                        | 0.838 (0.766 - 0.889)  | <0.0001*** |
| T2_MORPHOLOGICAL_voxelsCounting                           | 0.838 (0.766 - 0.889)  | <0.0001*** |
| ADC_GLSZM_GreyLevelVariance                               | 0.835 (0.759 - 0.889)  | <0.0001*** |
| T2_INTENSITY-BASED_Kurtosis                               | 0.831 (0.757 - 0.885)  | <0.0001*** |
| T2_INTENSITY-HISTOGRAM_INTENSITYHistogramKurtosis         | 0.83 (0.755 - 0.883)   | <0.0001*** |
| T2_INTENSITY-BASED_MaximumGreyLevel                       | 0.824 (0.747 - 0.88)   | <0.0001*** |
| T2_INTENSITY-HISTOGRAM_INTENSITYHistogramMaximumGreyLevel | 0.823 (0.746 - 0.879)  | <0.0001*** |
| T2_GLSZM_LowGrayLevelZoneEmphasis                         | 0.823 (0.745 - 0.879)  | <0.0001*** |
| ADC_GLCM2_SumVariance                                     | 0.82 (0.738 - 0.878)   | <0.0001*** |
| ADC_GLCM2_ClusterTendency                                 | 0.82 (0.738 - 0.878)   | <0.0001*** |
| T2_GLRLM_LongRunLowGreyLevelEmphasis                      | 0.82 (0.741 - 0.876)   | <0.0001*** |
| T2_GLRLM_LowGreyLevelRunEmphasis                          | 0.815 (0.734 - 0.873)  | <0.0001*** |
| T2_GLSZM_SmallZoneLowGreyLevelEmphasis                    | 0.814 (0.733 - 0.873)  | <0.0001*** |
| T2_GLRLM_ShortRunLowGreyLevelEmphasis                     | 0.813 (0.731 - 0.871)  | <0.0001*** |
| ADC_INTENSITY-BASED_Skewness                              | 0.81 (0.725 - 0.871)   | <0.0001*** |
| ADC_GLCM_SumVariance                                      | 0.809 (0.723 - 0.871)  | <0.0001*** |
| ADC_GLCM_ClusterTendency                                  | 0.809 (0.723 - 0.871)  | <0.0001*** |
| ADC_GLCM4_ClusterProminence                               | 0.808 (0.722 - 0.87)   | <0.0001*** |
| ADC_GLSZM_LargeZoneLowGreyLevelEmphasis                   | 0.807 (0.721 - 0.869)  | <0.0001*** |
| ADC_GLSZM_LargeZoneEmphasis                               | 0.807 (0.721 - 0.869)  | <0.0001*** |
| ADC_GLSZM_LargeZoneHighGreyLevelEmphasis                  | 0.804 (0.716 - 0.867)  | <0.0001*** |
| ADC_INTENSITY-HISTOGRAM_INTENSITYHistogramSkewness        | 0.797 (0.699 - 0.866)  | <0.0001*** |
| T2_INTENSITY-BASED_Range                                  | 0.785 (0.694 - 0.852)  | <0.0001*** |
| T2_INTENSITY-HISTOGRAM_INTENSITYHistogramRange            | 0.785 (0.694 - 0.852)  | <0.0001*** |
| ADC_GLCM2_NormalisedInverseDifferenceMoment               | 0.782 (0.686 - 0.852)  | <0.0001*** |
| ADC_NGTDm_Coarseness                                      | 0.782 (0.677 - 0.855)  | <0.0001*** |
| ADC_GLCM4_NormalisedInverseDifference                     | 0.779 (0.681 - 0.849)  | <0.0001*** |
| T2_INTENSITY-HISTOGRAM_RootMeanSquare                     | 0.773 (0.677 - 0.843)  | <0.0001*** |
| ADC_GLCM_SumEntropy                                       | 0.771 (0.67 - 0.844)   | <0.0001*** |
| ADC_GLCM2_SumEntropy                                      | 0.766 (0.664 - 0.84)   | <0.0001*** |
| ADC_GLCM_NormalisedInverseDifferenceMoment                | 0.758 (0.653 - 0.835)  | <0.0001*** |
| ADC_GLCM4_SumEntropy                                      | 0.753 (0.647 - 0.831)  | <0.0001*** |
| T2_NGTDm_Coarseness                                       | 0.74 (0.634 - 0.82)    | <0.0001*** |
| ADC_NGTDm_Complexity                                      | 0.725 (0.609 - 0.811)  | <0.0001*** |
| T2_GLSZM_ZoneSizeEntropy                                  | 0.723 (0.61 - 0.806)   | <0.0001*** |
| T2_INTENSITY-BASED_MinimumGreyLevel                       | 0.694 (0.573 - 0.786)  | <0.0001*** |
| T2_INTENSITY-HISTOGRAM_INTENSITYHistogramMinimumGreyLevel | 0.691 (0.569 - 0.783)  | <0.0001*** |
| ADC_GLCM4_DifferenceAverage                               | 0.63 (0.486 - 0.741)   | <0.0001*** |
| ADC_GLCM4_Dissimilarity                                   | 0.63 (0.486 - 0.741)   | <0.0001*** |
| ADC_INTENSITY-BASED_Kurtosis                              | 0.613 (0.464 - 0.728)  | <0.0001*** |
| ADC_INTENSITY-HISTOGRAM_INTENSITYHistogramKurtosis        | 0.603 (0.439 - 0.727)  | <0.0001*** |
| ADC_GLCM_ClusterShade                                     | 0.603 (0.451 - 0.72)   | <0.0001*** |
| ADC_GLCM4_ClusterShade                                    | 0.593 (0.44 - 0.713)   | <0.0001*** |
| ADC_GLCM2_ClusterShade                                    | 0.577 (0.42 - 0.701)   | <0.0001*** |
| ADC_GLCM_ClusterProminence                                | 0.549 (0.385 - 0.679)  | <0.0001*** |
| ADC_GLCM2_ClusterProminence                               | 0.518 (0.348 - 0.656)  | <0.0001*** |
| T2_GLCM4_InverseVariance                                  | 0.45 (0.274 - 0.597)   | <0.0001*** |
| T2_GLCM2_InverseVariance                                  | 0.434 (0.256 - 0.585)  | <0.0001*** |
| ADC_GLCM4_NormalisedInverseDifferenceMoment               | 0.428 (0.242 - 0.584)  | <0.0001*** |
| ADC_GLCM4_DifferenceVariance                              | 0.41 (0.221 - 0.569)   | <0.0001*** |
| T2_GLCM_InverseVariance                                   | 0.405 (0.222 - 0.561)  | <0.0001*** |
| ADC_GLCM4_Contrast                                        | 0.372 (0.178 - 0.538)  | 0,0002***  |
| ADC_GLCM4_Correlation                                     | 0.158 (-0.051 - 0.354) | 0,0688     |

NOTE.- \*\*\*:  $P < 0.0001$

**Supplementary Table S3.** Understanding unsupervised radiomics clusters

| Characteristics                 | Cluster T2   |              | adjusted<br><i>P</i> -value | Cluster ADC  |             |              | adjusted<br><i>P</i> -value | Cluster T2+ADC |                | adjusted<br><i>P</i> -value |
|---------------------------------|--------------|--------------|-----------------------------|--------------|-------------|--------------|-----------------------------|----------------|----------------|-----------------------------|
|                                 | Group T2-1   | Group T2-2   |                             | Group ADC-1  | Group ADC-2 | Group ADC-3  |                             | Group T2+ADC-1 | Group T2+ADC-2 |                             |
| <b>Initial prostate volume</b>  | 89.6 ± 38.6  | 99.8 ± 43.2  | 0.3104                      | 85.1 ± 40.6  | 96.6 ± 35.1 | 97.2 ± 44.4  | 0.4560                      | 86.4 ± 39.1    | 99.9 ± 41.8    | 0.1866                      |
| <b>Initial IPSS</b>             | 19.2 ± 6.1   | 18.5 ± 6.1   | 0.5936                      | 19.7 ± 4.63  | 17.5 ± 6.86 | 19.2 ± 6.07  | 0.4960                      | 19.3 ± 6.5     | 18.6 ± 5.8     | 0.6562                      |
| <b>Initial QOL</b>              | 4.8 ± 1.3    | 4.7 ± 1.2    | 0.8714                      | 4.8 ± 1.4    | 4.7 ± 1.0   | 4.74 ± 1.2   | 0.807                       | 4.6 ± 1.2      | 4.8 ± 0.8      | 0.4558                      |
| <b>Wasserman classification</b> |              |              | 0.2170                      |              |             |              | 0.2274                      |                |                | 0.2170                      |
| Type 1                          | 17/35 (48.6) | 12/37 (32.4) | <b>0.0291*</b>              | 8/13 (61.5)  | 6/20 (30)   | 15/39 (38.5) | 0.3290                      | 14/27 (51.9)   | 15/45 (33.3)   | 0.2363                      |
| Type 2                          | 7/35 (20)    | 4/37 (10.8)  |                             | 2/13 (15.4)  | 5/20 (25)   | 4/39 (10.3)  |                             | 5/27 (18.5)    | 6/45 (13.3)    |                             |
| Type 3                          | 11/35 (31.4) | 21/37 (56.8) |                             | 3/13 (23.1)  | 9/20 (45)   | 20/39 (51.3) |                             | 8/27 (29.6)    | 24/45 (53.3)   |                             |
| <b>adBPH</b>                    |              |              |                             |              |             |              |                             |                |                |                             |
| No                              | 21/35 (60)   | 10/37 (27)   | 0.8590                      | 8/13 (61.5)  | 8/20 (40)   | 15/39 (38.5) | 1                           | 15/27 (55.6)   | 16/45 (35.6)   | 0.8590                      |
| Yes                             | 14/35 (40)   | 27/37 (73)   |                             | 5/13 (38.5)  | 12/20 (60)  | 24/39 (61.5) |                             | 12/27 (44.4)   | 29/45 (64.4)   |                             |
| <b>Clinical success at M3</b>   |              |              | 0.8590                      |              |             |              | 1                           |                |                | 0.8590                      |
| No                              | 6/35 (17.1)  | 7/37 (18.9)  | 1                           | 2/13 (15.4)  | 4/20 (20)   | 7/39 (17.9)  | 1                           | 6/27 (22.2)    | 7/45 (15.6)    | 1                           |
| Yes                             | 29/35 (82.9) | 30/37 (81.1) |                             | 11/13 (84.6) | 16/20 (80)  | 32/39 (82.1) |                             | 21/27 (77.8)   | 38/45 (84.4)   |                             |
| <b>Clinical success at Y2</b>   |              |              | 1                           |              |             |              | 1                           |                |                | 1                           |
| No                              | 14/35 (40)   | 15/37 (40.5) | 1                           | 5/13 (38.5)  | 10/20 (50)  | 14/39 (35.9) | 1                           | 13/27 (48.1)   | 16/45 (35.6)   | 1                           |
| Yes                             | 21/35 (60)   | 22/37 (59.5) |                             | 8/13 (61.5)  | 10/20 (50)  | 25/39 (64.1) |                             | 14/27 (51.9)   | 29/45 (64.4)   |                             |

NOTE.- \*: adjusted  $P < 0.05$  (according to Benjamini-Hochberg procedure). All tests were non-parametric tests, either unpaired Mann-Whitney test, or Kruskal-Wallis test, or Chi-square test.

For continuous variables (volume, IPSS and QOL) data are mean ± standard deviation. For categorical, they are number of patients with percentage in parentheses.

Abbreviations: adBPH: adenomatous dominant benign prostate hypertrophy, ADC: apparent diffusion coefficient, IPSS: international prostate score symptom M3: at 3 months after prostate artery embolization, QOL: quality of life, Y2: at 2 years after prostate artery embolization.

**Supplementary Table S4.** Radiomics features selected by Elasticnet

| <b>Selected radiomics features</b>                                        | <b>Coefficients</b> |
|---------------------------------------------------------------------------|---------------------|
| T2_GLSZM_ZoneSizeVariance                                                 | 5.655               |
| ADC_GLCM_InverseVariance                                                  | 5.644               |
| ADC_GLCM_Correlation                                                      | 5.307               |
| T2_MORPHOLOGICAL_SurfaceToVolumeRatio                                     | 4.087               |
| ADC_GLCM_NormalisedInverseDifference                                      | 3.428               |
| T2_MORPHOLOGICAL_Volume                                                   | 3.859               |
| T2_INTENSITY-BASED_Skewness                                               | 2.687               |
| ADC_INTENSITY-HISTOGRAM_INTENSITYHistogram10thPercentile                  | 2.346               |
| ADC_INTENSITY-HISTOGRAM_INTENSITYHistogramMinimumGreyLevel                | 2.149               |
| ADC_INTENSITY-HISTOGRAM_INTENSITYHistogramQuartileCoefficientOfDispersion | 1.435               |
| T2_INTENSITY-BASED_50thPercentile                                         | 0.037               |
| T2_GLSZM_LargeZoneLowGreyLevelEmphasis                                    | -0.056              |
| T2_MORPHOLOGICAL_CentreOfMassShift                                        | -0.225              |
| T2_MORPHOLOGICAL_Compactness2                                             | -0.275              |
| T2_GLCM_NormalisedInverseDifferenceMoment                                 | -0.283              |
| ADC_GLSZM_ZoneSizeVariance                                                | -0.510              |
| T2_GLCM2_ClusterShade                                                     | -0.695              |
| T2_NGTD_M_Busyness                                                        | -1.229              |
| T2_NGTD_M_Strength                                                        | -1.280              |
| T2_GLCM2_Correlation                                                      | -1.329              |
| ADC_NGTD_M_Strength                                                       | -1.369              |
| T2_INTENSITY-HISTOGRAM_MaximumHistogramGradientGreyLevel                  | -1.467              |

NOTE.- The selected radiomics features are ordered in descending order according to their coefficient (i.e., strength in the final model)
